# Supplementary material for: DMABI tripod structures with sensing capabilities: synthesis, characterization and fluorescence analysis
Source: Royal Society of Chemistry journal article supplement (doi:10.1039/c5nj03613e), 2016-01-01
Supplement: c5nj03613e1.pdf [file c5nj03613e1.pdf]

# Supporting Information

## **DMABI Tripod Structures with Sensing Capabilities: Synthesis, Characterization and Fluorescence Analysis**

Rafael Contreras-Cáceres,<sup>a</sup> Manolo Doña,<sup>a</sup> Maria Rosa López-Ramírez,<sup>b</sup> Manuel Algarra,<sup>c</sup> Jesus Hierrezuelo,<sup>a</sup> Miguel Angel Casado-Rodríguez,<sup>a</sup> Maria Sánchez-Molina,<sup>a</sup> Amelia Díaz,<sup>a</sup> Bruno B. Campos,<sup>d</sup> Joaquim C. G. Esteves da Silva,<sup>d</sup> and Juan Manuel López-Romero<sup>a,\*†</sup>

*<sup>a</sup>Dep. Química Orgánica, Facultad de Ciencias, Universidad de Málaga, Campus de Teatinos  
s/n, 29071 Málaga, Spain.*

*<sup>b</sup>Dep. Química Física, Facultad de Ciencias, Universidad de Málaga, Campus de Teatinos s/n,  
29071 Málaga, Spain.*

*<sup>c</sup>Dep. Química Inorgánica, Facultad de Ciencias, Universidad de Málaga, Campus de Teatinos  
s/n, 29071 Málaga, Spain.*

*<sup>d</sup>Centro de Investigação em Química, Departamento de Química e Bioquímica, Faculdade de  
Ciências da Universidade do Porto, Porto, Portugal.*

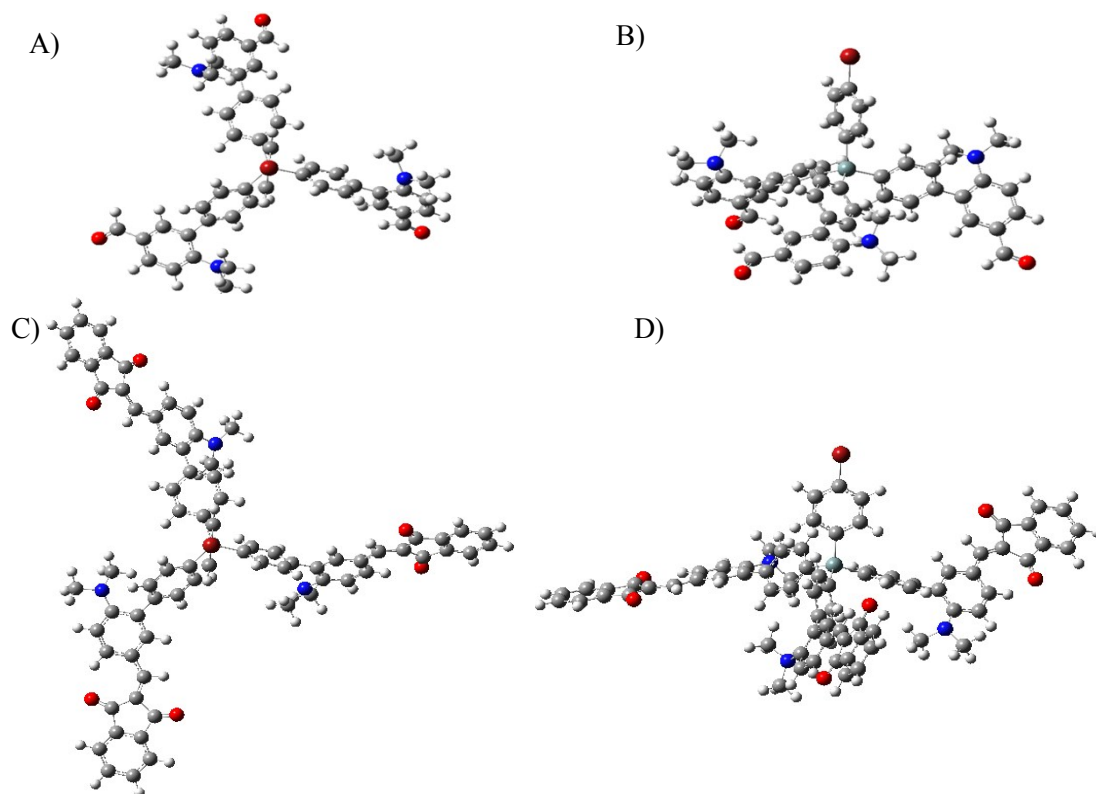

**Figure S1.** Top view (A) and side view (B) of optimized geometries obtained for **4** and top view (C) and side view (D) of optimized geometries obtained for **1**.

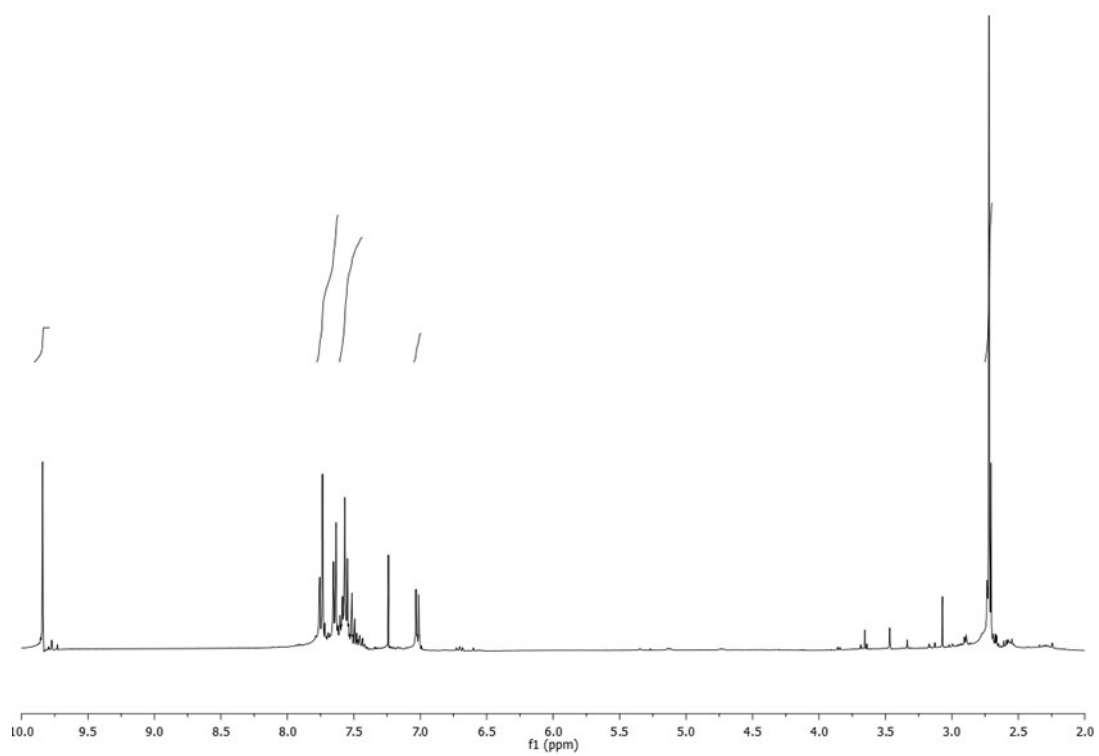

$^1\text{H}$  NMR spectrum of compound 4

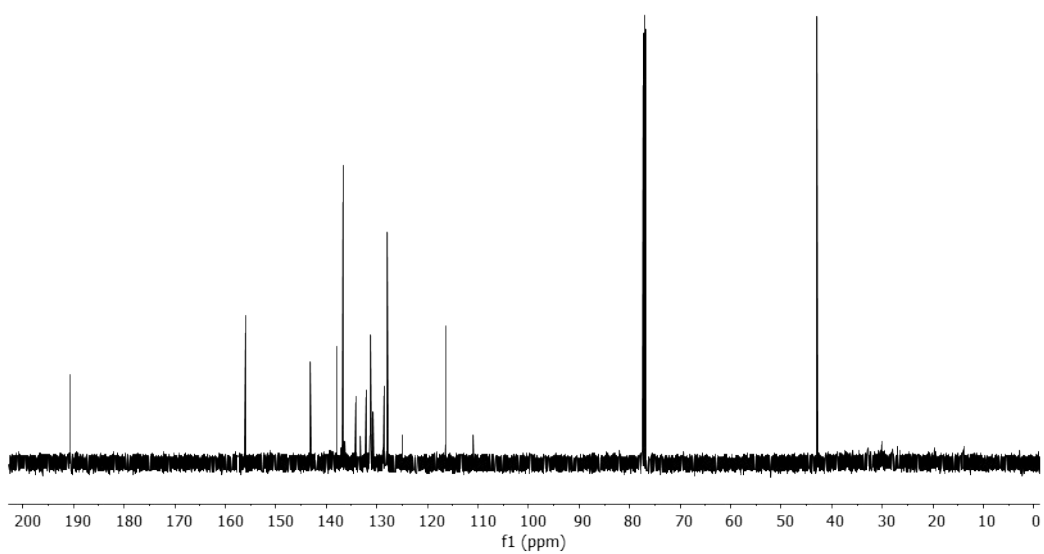

$^{13}\text{C}$  NMR spectrum of compound 4

**Figure S2.**  $^1\text{H}$  and  $^{13}\text{C}$  NMR spectra for compound 4

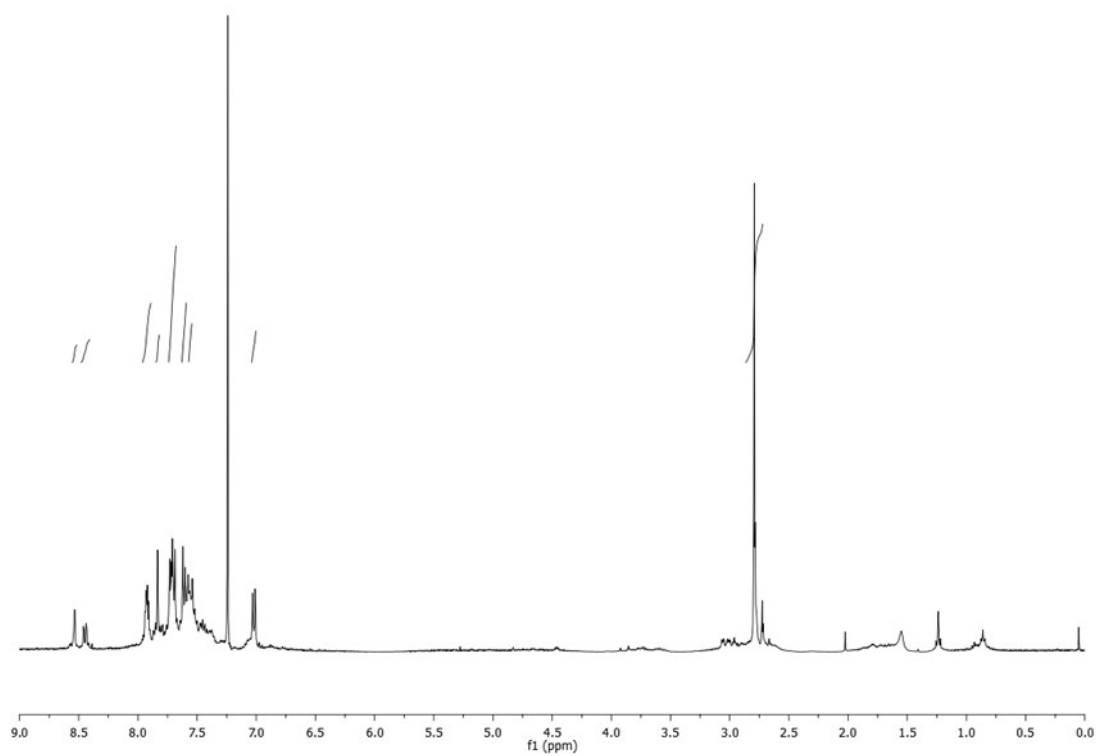

$^1\text{H}$  NMR spectrum of compound 1

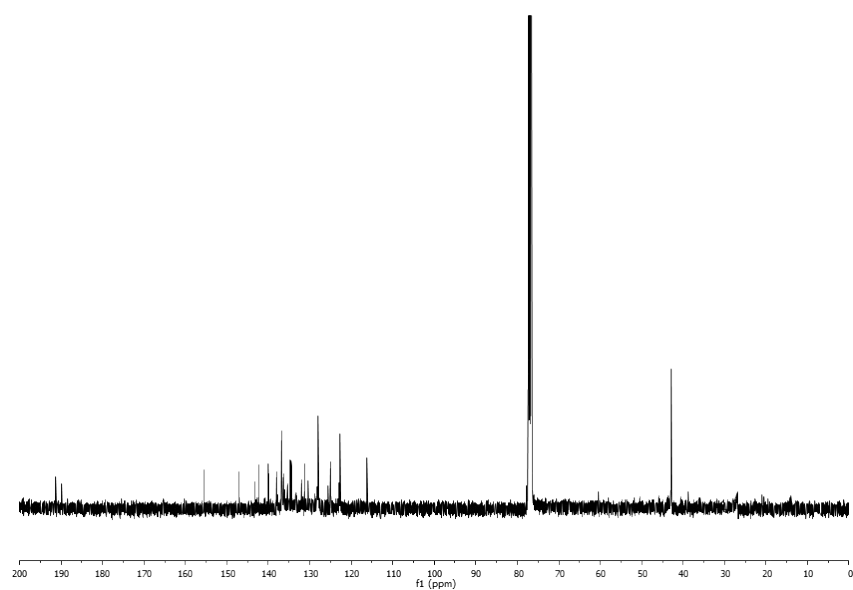

$^{13}\text{C}$  NMR spectrum of compound 1

**Figure S3.**  $^1\text{H}$  and  $^{13}\text{C}$  NMR spectra for compound 4

**Figure S2.** Optimized molecular structure of compound 4 (top view) with the corresponding atom labels calculated at the B3LYP/6-31G\* level of theory.

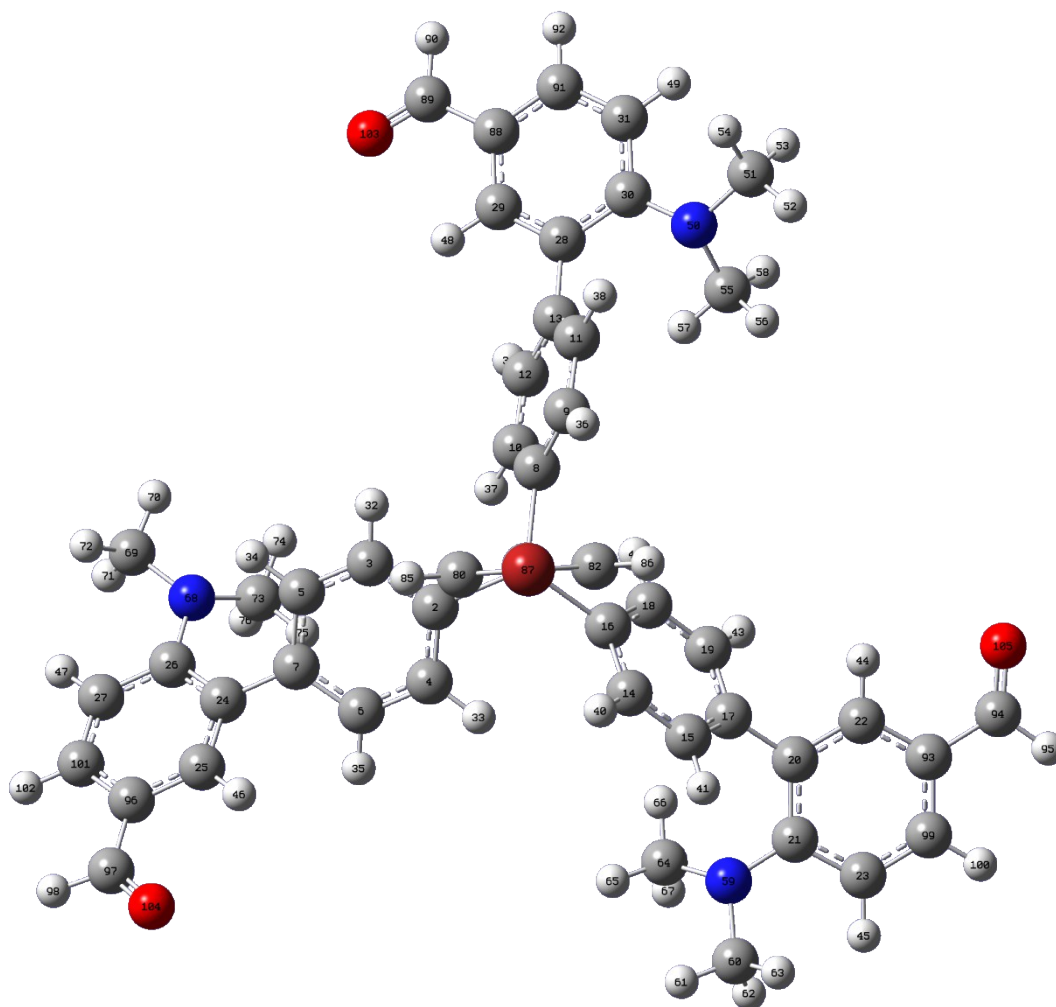

**Table S1.** Cartesian coordinates (x,y,z) in the optimized molecular structure of compound 4calculated at the B3LYP/6-31G\* level of theory.

| Center<br>Number | Atomic<br>Number | Atomic<br>Type | Coordinates (Angstroms) |           |           |
|------------------|------------------|----------------|-------------------------|-----------|-----------|
|                  |                  |                | X                       | Y         | Z         |
| 1                | 14               | 0              | 0.020522                | 0.063924  | 0.770610  |
| 2                | 6                | 0              | 1.785462                | -0.162188 | 0.128844  |
| 3                | 6                | 0              | 2.431750                | -1.412989 | 0.197074  |
| 4                | 6                | 0              | 2.521810                | 0.909861  | -0.403101 |
| 5                | 6                | 0              | 3.745008                | -1.583396 | -0.234375 |
| 6                | 6                | 0              | 3.837517                | 0.745824  | -0.836568 |
| 7                | 6                | 0              | 4.474421                | -0.502704 | -0.759289 |
| 8                | 6                | 0              | -0.999308               | -1.454293 | 0.285550  |
| 9                | 6                | 0              | -1.960237               | -2.012936 | 1.149195  |
| 10               | 6                | 0              | -0.851504               | -2.052284 | -0.979436 |
| 11               | 6                | 0              | -2.742283               | -3.101020 | 0.768994  |
| 12               | 6                | 0              | -1.631665               | -3.141854 | -1.366421 |
| 13               | 6                | 0              | -2.593857               | -3.684953 | -0.500113 |
| 14               | 6                | 0              | -0.505306               | 2.897840  | 0.576714  |
| 15               | 6                | 0              | -1.042014               | 4.054531  | 0.016216  |
| 16               | 6                | 0              | -0.749681               | 1.623838  | 0.025533  |
| 17               | 6                | 0              | -1.858430               | 3.987471  | -1.125593 |
| 18               | 6                | 0              | -1.567106               | 1.568739  | -1.116435 |
| 19               | 6                | 0              | -2.110037               | 2.722963  | -1.680757 |
| 20               | 6                | 0              | -2.517736               | 5.203101  | -1.685897 |
| 21               | 6                | 0              | -1.828400               | 6.430527  | -1.945119 |
| 22               | 6                | 0              | -3.894143               | 5.155073  | -1.896809 |
| 23               | 6                | 0              | -2.580720               | 7.555400  | -2.339072 |
| 24               | 6                | 0              | 5.906609                | -0.645371 | -1.152240 |
| 25               | 6                | 0              | 6.818653                | 0.263508  | -0.619951 |
| 26               | 6                | 0              | 6.398787                | -1.703356 | -1.981014 |
| 27               | 6                | 0              | 7.790828                | -1.820483 | -2.167843 |
| 28               | 6                | 0              | -3.366612               | -4.898088 | -0.896098 |
| 29               | 6                | 0              | -2.653798               | -5.992997 | -1.379320 |
| 30               | 6                | 0              | -4.784168               | -5.019469 | -0.737177 |
| 31               | 6                | 0              | -5.387943               | -6.263052 | -1.012584 |
| 32               | 1                | 0              | 1.898884                | -2.275937 | 0.590426  |
| 33               | 1                | 0              | 2.061473                | 1.891067  | -0.488510 |
| 34               | 1                | 0              | 4.213509                | -2.559902 | -0.168062 |
| 35               | 1                | 0              | 4.377594                | 1.593379  | -1.250848 |
| 36               | 1                | 0              | -2.094185               | -1.599100 | 2.145529  |
| 37               | 1                | 0              | -0.109164               | -1.669875 | -1.676602 |
| 38               | 1                | 0              | -3.472218               | -3.509271 | 1.460346  |
| 39               | 1                | 0              | -1.498658               | -3.576665 | -2.353834 |
| 40               | 1                | 0              | 0.101934                | 2.990767  | 1.474354  |
| 41               | 1                | 0              | -0.836567               | 5.019577  | 0.467756  |
| 42               | 1                | 0              | -1.792965               | 0.608892  | -1.574234 |
| 43               | 1                | 0              | -2.736053               | 2.645727  | -2.566093 |
| 44               | 1                | 0              | -4.439054               | 4.238973  | -1.689658 |
| 45               | 1                | 0              | -2.074968               | 8.492022  | -2.542372 |
| 46               | 1                | 0              | 6.467869                | 1.063853  | 0.024713  |
| 47               | 1                | 0              | 8.180918                | -2.614647 | -2.793573 |
| 48               | 1                | 0              | -1.575731               | -5.926676 | -1.491053 |
| 49               | 1                | 0              | -6.460171               | -6.373158 | -0.900282 |
| 50               | 7                | 0              | -5.552633               | -3.933042 | -0.285246 |
| 51               | 6                | 0              | -6.879907               | -4.204252 | 0.245274  |

|     |    |   |           |           |           |
|-----|----|---|-----------|-----------|-----------|
| 52  | 1  | 0 | -7.223116 | -3.316402 | 0.786465  |
| 53  | 1  | 0 | -7.629070 | -4.430526 | -0.533924 |
| 54  | 1  | 0 | -6.842994 | -5.040114 | 0.948953  |
| 55  | 6  | 0 | -5.516410 | -2.690708 | -1.060563 |
| 56  | 1  | 0 | -5.790581 | -1.848875 | -0.415762 |
| 57  | 1  | 0 | -4.518452 | -2.505993 | -1.453959 |
| 58  | 1  | 0 | -6.224779 | -2.726407 | -1.905366 |
| 59  | 7  | 0 | -0.435110 | 6.521621  | -1.778902 |
| 60  | 6  | 0 | 0.155255  | 7.845332  | -1.652222 |
| 61  | 1  | 0 | 1.174288  | 7.733839  | -1.267195 |
| 62  | 1  | 0 | 0.217621  | 8.393648  | -2.608884 |
| 63  | 1  | 0 | -0.415116 | 8.447430  | -0.940061 |
| 64  | 6  | 0 | 0.411946  | 5.617718  | -2.559947 |
| 65  | 1  | 0 | 1.377913  | 5.496635  | -2.057701 |
| 66  | 1  | 0 | -0.048580 | 4.635827  | -2.653104 |
| 67  | 1  | 0 | 0.594552  | 6.016126  | -3.572364 |
| 68  | 7  | 0 | 5.515097  | -2.624954 | -2.569914 |
| 69  | 6  | 0 | 6.058115  | -3.888925 | -3.044142 |
| 70  | 1  | 0 | 5.225784  | -4.578464 | -3.219055 |
| 71  | 1  | 0 | 6.622592  | -3.799344 | -3.989186 |
| 72  | 1  | 0 | 6.711907  | -4.327971 | -2.286005 |
| 73  | 6  | 0 | 4.475714  | -2.107011 | -3.462223 |
| 74  | 1  | 0 | 3.648641  | -2.823304 | -3.514327 |
| 75  | 1  | 0 | 4.083187  | -1.160314 | -3.094968 |
| 76  | 1  | 0 | 4.865610  | -1.951990 | -4.482611 |
| 77  | 6  | 0 | 0.040959  | 0.249054  | 2.656383  |
| 78  | 6  | 0 | 1.123497  | -0.204658 | 3.430992  |
| 79  | 6  | 0 | -1.048675 | 0.820980  | 3.340728  |
| 80  | 6  | 0 | 1.124481  | -0.104514 | 4.823184  |
| 81  | 1  | 0 | 1.992304  | -0.640722 | 2.944875  |
| 82  | 6  | 0 | -1.068862 | 0.929191  | 4.731865  |
| 83  | 1  | 0 | -1.900055 | 1.204297  | 2.783200  |
| 84  | 6  | 0 | 0.022891  | 0.461480  | 5.460125  |
| 85  | 1  | 0 | 1.969903  | -0.457232 | 5.404329  |
| 86  | 1  | 0 | -1.916305 | 1.373920  | 5.242650  |
| 87  | 35 | 0 | 0.010383  | 0.607328  | 7.367413  |
| 88  | 6  | 0 | -3.268603 | -7.218858 | -1.676327 |
| 89  | 6  | 0 | -2.476391 | -8.355337 | -2.173232 |
| 90  | 1  | 0 | -3.065897 | -9.282705 | -2.355290 |
| 91  | 6  | 0 | -4.644942 | -7.344701 | -1.468879 |
| 92  | 1  | 0 | -5.141696 | -8.288525 | -1.685394 |
| 93  | 6  | 0 | -4.630516 | 6.274098  | -2.314197 |
| 94  | 6  | 0 | -6.086643 | 6.184047  | -2.510732 |
| 95  | 1  | 0 | -6.568719 | 7.138051  | -2.823938 |
| 96  | 6  | 0 | 8.201000  | 0.153806  | -0.834209 |
| 97  | 6  | 0 | 9.132478  | 1.128687  | -0.243259 |
| 98  | 1  | 0 | 10.206476 | 0.930025  | -0.461883 |
| 99  | 6  | 0 | -3.956840 | 7.481659  | -2.515895 |
| 100 | 1  | 0 | -4.509134 | 8.364369  | -2.832439 |
| 101 | 6  | 0 | 8.677159  | -0.912717 | -1.601364 |
| 102 | 1  | 0 | 9.746202  | -1.021750 | -1.773617 |
| 103 | 8  | 0 | -1.276251 | -8.333747 | -2.385543 |
| 104 | 8  | 0 | 8.806129  | 2.088735  | 0.432811  |
| 105 | 8  | 0 | -6.753221 | 5.175132  | -2.358095 |

---

**Figure S3.** Optimized molecular structure (top view) of compound 1 with the corresponding atom labels calculated at the B3LYP/6-31G\* level of theory.

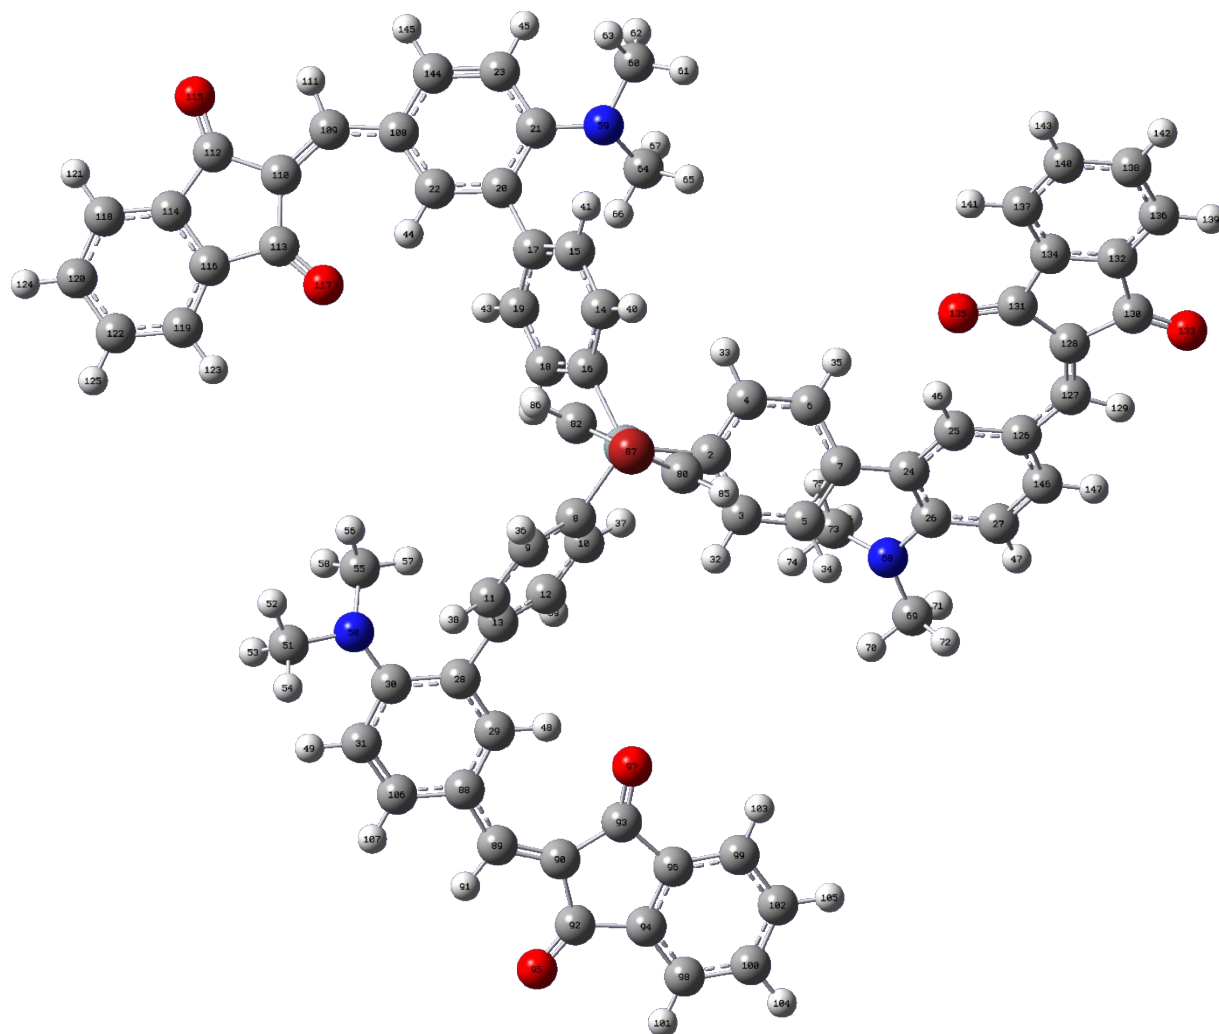



**Table S2.** Cartesian coordinates (x,y,z) in the optimized molecular structure of compound 1calculated at the B3LYP/6-31G\* level of theory.

| Center<br>Number | Atomic<br>Number | Atomic<br>Type | Coordinates (Angstroms) |           |           |
|------------------|------------------|----------------|-------------------------|-----------|-----------|
|                  |                  |                | X                       | Y         | Z         |
| 1                | 14               | 0              | 0.061038                | 0.369744  | 1.114465  |
| 2                | 6                | 0              | 1.703622                | 0.031326  | 0.239409  |
| 3                | 6                | 0              | 2.339431                | -1.222718 | 0.335877  |
| 4                | 6                | 0              | 2.362671                | 1.026440  | -0.502524 |
| 5                | 6                | 0              | 3.565761                | -1.470062 | -0.276441 |
| 6                | 6                | 0              | 3.592106                | 0.786114  | -1.115774 |
| 7                | 6                | 0              | 4.214705                | -0.468204 | -1.018370 |
| 8                | 6                | 0              | -1.014973               | -1.183221 | 1.014218  |
| 9                | 6                | 0              | -1.864765               | -1.565526 | 2.069263  |
| 10               | 6                | 0              | -1.026024               | -1.988761 | -0.139263 |
| 11               | 6                | 0              | -2.693082               | -2.680953 | 1.974368  |
| 12               | 6                | 0              | -1.849353               | -3.110279 | -0.238921 |
| 13               | 6                | 0              | -2.702759               | -3.473597 | 0.814386  |
| 14               | 6                | 0              | -0.482403               | 3.157984  | 0.592014  |
| 15               | 6                | 0              | -1.103614               | 4.233018  | -0.038894 |
| 16               | 6                | 0              | -0.829021               | 1.824433  | 0.295469  |
| 17               | 6                | 0              | -2.112004               | 4.021801  | -0.994957 |
| 18               | 6                | 0              | -1.842794               | 1.625270  | -0.657336 |
| 19               | 6                | 0              | -2.473305               | 2.697658  | -1.288309 |
| 20               | 6                | 0              | -2.842986               | 5.164533  | -1.618597 |
| 21               | 6                | 0              | -2.187225               | 6.313299  | -2.166525 |
| 22               | 6                | 0              | -4.234896               | 5.129692  | -1.584499 |
| 23               | 6                | 0              | -2.985616               | 7.406712  | -2.567260 |
| 24               | 6                | 0              | 5.558432                | -0.696914 | -1.627183 |
| 25               | 6                | 0              | 6.550168                | 0.244533  | -1.362576 |
| 26               | 6                | 0              | 5.888078                | -1.861158 | -2.392439 |
| 27               | 6                | 0              | 7.235790                | -2.049138 | -2.769215 |
| 28               | 6                | 0              | -3.529281               | -4.713704 | 0.727494  |
| 29               | 6                | 0              | -2.880924               | -5.890925 | 0.362723  |
| 30               | 6                | 0              | -4.916896               | -4.759040 | 1.076683  |
| 31               | 6                | 0              | -5.550743               | -6.020269 | 1.116746  |
| 32               | 1                | 0              | 1.866281                | -2.027866 | 0.893397  |
| 33               | 1                | 0              | 1.907908                | 2.007754  | -0.612906 |
| 34               | 1                | 0              | 4.026244                | -2.448578 | -0.184105 |
| 35               | 1                | 0              | 4.075860                | 1.577868  | -1.681394 |
| 36               | 1                | 0              | -1.872813               | -0.988770 | 2.990824  |
| 37               | 1                | 0              | -0.373431               | -1.747831 | -0.975194 |
| 38               | 1                | 0              | -3.334496               | -2.948943 | 2.808049  |
| 39               | 1                | 0              | -1.830688               | -3.714842 | -1.141720 |
| 40               | 1                | 0              | 0.276662                | 3.365815  | 1.343004  |
| 41               | 1                | 0              | -0.813915               | 5.247876  | 0.214583  |
| 42               | 1                | 0              | -2.154902               | 0.615127  | -0.910434 |
| 43               | 1                | 0              | -3.258879               | 2.508463  | -2.014867 |
| 44               | 1                | 0              | -4.728440               | 4.261164  | -1.163614 |
| 45               | 1                | 0              | -2.515659               | 8.291248  | -2.980701 |
| 46               | 1                | 0              | 6.298389                | 1.122787  | -0.779124 |
| 47               | 1                | 0              | 7.515315                | -2.923660 | -3.344796 |
| 48               | 1                | 0              | -1.827993               | -5.853143 | 0.106859  |
| 49               | 1                | 0              | -6.599924               | -6.085223 | 1.379336  |
| 50               | 7                | 0              | -5.625253               | -3.598811 | 1.403551  |
| 51               | 6                | 0              | -6.891076               | -3.727590 | 2.108334  |

|     |    |   |           |            |           |
|-----|----|---|-----------|------------|-----------|
| 52  | 1  | 0 | -7.153962 | -2.749946  | 2.525373  |
| 53  | 1  | 0 | -7.723100 | -4.049406  | 1.458051  |
| 54  | 1  | 0 | -6.796355 | -4.436626  | 2.934666  |
| 55  | 6  | 0 | -5.622872 | -2.466583  | 0.474378  |
| 56  | 1  | 0 | -5.726061 | -1.528253  | 1.030079  |
| 57  | 1  | 0 | -4.695118 | -2.426523  | -0.091776 |
| 58  | 1  | 0 | -6.461747 | -2.544232  | -0.236902 |
| 59  | 7  | 0 | -0.794202 | 6.375415   | -2.275067 |
| 60  | 6  | 0 | -0.164464 | 7.672603   | -2.466545 |
| 61  | 1  | 0 | 0.903367  | 7.573358   | -2.245760 |
| 62  | 1  | 0 | -0.259304 | 8.057444   | -3.496794 |
| 63  | 1  | 0 | -0.588547 | 8.406661   | -1.776710 |
| 64  | 6  | 0 | -0.080438 | 5.305698   | -2.975063 |
| 65  | 1  | 0 | 0.924358  | 5.191441   | -2.553550 |
| 66  | 1  | 0 | -0.602753 | 4.356890   | -2.874603 |
| 67  | 1  | 0 | 0.017241  | 5.538567   | -4.048306 |
| 68  | 7  | 0 | 4.917917  | -2.808647  | -2.733883 |
| 69  | 6  | 0 | 5.349719  | -4.130347  | -3.159861 |
| 70  | 1  | 0 | 4.490036  | -4.806621  | -3.109196 |
| 71  | 1  | 0 | 5.733656  | -4.152892  | -4.194659 |
| 72  | 1  | 0 | 6.124067  | -4.511818  | -2.489386 |
| 73  | 6  | 0 | 3.699332  | -2.376913  | -3.421400 |
| 74  | 1  | 0 | 2.864737  | -3.031195  | -3.146294 |
| 75  | 1  | 0 | 3.437592  | -1.356825  | -3.149146 |
| 76  | 1  | 0 | 3.832168  | -2.422696  | -4.514996 |
| 77  | 6  | 0 | 0.384168  | 0.814157   | 2.928435  |
| 78  | 6  | 0 | 1.580606  | 0.451017   | 3.572182  |
| 79  | 6  | 0 | -0.581255 | 1.494821   | 3.694791  |
| 80  | 6  | 0 | 1.808606  | 0.740570   | 4.918376  |
| 81  | 1  | 0 | 2.360545  | -0.062810  | 3.016263  |
| 82  | 6  | 0 | -0.374570 | 1.792320   | 5.042651  |
| 83  | 1  | 0 | -1.513730 | 1.814246   | 3.235216  |
| 84  | 6  | 0 | 0.823328  | 1.408298   | 5.641215  |
| 85  | 1  | 0 | 2.739124  | 0.455424   | 5.397469  |
| 86  | 1  | 0 | -1.129098 | 2.318120   | 5.618109  |
| 87  | 35 | 0 | 1.123422  | 1.813302   | 7.487432  |
| 88  | 6  | 0 | -3.526127 | -7.148806  | 0.365838  |
| 89  | 6  | 0 | -2.912204 | -8.404478  | 0.012575  |
| 90  | 6  | 0 | -1.673782 | -8.780460  | -0.425735 |
| 91  | 1  | 0 | -3.580790 | -9.262839  | 0.114245  |
| 92  | 6  | 0 | -1.421402 | -10.232738 | -0.682629 |
| 93  | 6  | 0 | -0.423608 | -8.044555  | -0.741561 |
| 94  | 6  | 0 | -0.006579 | -10.350859 | -1.143360 |
| 95  | 8  | 0 | -2.213167 | -11.153442 | -0.544389 |
| 96  | 6  | 0 | 0.570942  | -9.076850  | -1.177229 |
| 97  | 8  | 0 | -0.180687 | -6.843278  | -0.685877 |
| 98  | 6  | 0 | 0.718589  | -11.482915 | -1.501611 |
| 99  | 6  | 0 | 1.893609  | -8.897313  | -1.570596 |
| 100 | 6  | 0 | 2.047669  | -11.308436 | -1.897211 |
| 101 | 1  | 0 | 0.255972  | -12.464867 | -1.469753 |
| 102 | 6  | 0 | 2.628198  | -10.030346 | -1.930864 |
| 103 | 1  | 0 | 2.329805  | -7.902980  | -1.590176 |
| 104 | 1  | 0 | 2.643419  | -12.171301 | -2.182545 |
| 105 | 1  | 0 | 3.664434  | -9.925358  | -2.241185 |
| 106 | 6  | 0 | -4.875940 | -7.178514  | 0.775257  |
| 107 | 1  | 0 | -5.404251 | -8.128523  | 0.800428  |
| 108 | 6  | 0 | -5.035926 | 6.207138   | -2.026744 |
| 109 | 6  | 0 | -6.477455 | 6.235702   | -2.016049 |

|     |   |   |            |           |           |
|-----|---|---|------------|-----------|-----------|
| 110 | 6 | 0 | -7.453949  | 5.339486  | -1.684294 |
| 111 | 1 | 0 | -6.899875  | 7.184404  | -2.356124 |
| 112 | 6 | 0 | -8.883114  | 5.759848  | -1.825901 |
| 113 | 6 | 0 | -7.444596  | 3.934554  | -1.203773 |
| 114 | 6 | 0 | -9.719523  | 4.590111  | -1.425948 |
| 115 | 8 | 0 | -9.296906  | 6.847729  | -2.198591 |
| 116 | 6 | 0 | -8.880358  | 3.529196  | -1.067938 |
| 117 | 8 | 0 | -6.499292  | 3.194746  | -0.950182 |
| 118 | 6 | 0 | -11.104350 | 4.462845  | -1.381019 |
| 119 | 6 | 0 | -9.402130  | 2.307350  | -0.654105 |
| 120 | 6 | 0 | -11.633883 | 3.237799  | -0.966023 |
| 121 | 1 | 0 | -11.742500 | 5.295333  | -1.662097 |
| 122 | 6 | 0 | -10.792376 | 2.172585  | -0.606985 |
| 123 | 1 | 0 | -8.738844  | 1.492710  | -0.379019 |
| 124 | 1 | 0 | -12.711273 | 3.103881  | -0.919384 |
| 125 | 1 | 0 | -11.232742 | 1.231589  | -0.288097 |
| 126 | 6 | 0 | 7.890793   | 0.077652  | -1.778049 |
| 127 | 6 | 0 | 8.963118   | 1.010904  | -1.534923 |
| 128 | 6 | 0 | 9.049170   | 2.244839  | -0.955251 |
| 129 | 1 | 0 | 9.934586   | 0.667380  | -1.898798 |
| 130 | 6 | 0 | 10.386314  | 2.914824  | -0.901990 |
| 131 | 6 | 0 | 8.060814   | 3.165542  | -0.337681 |
| 132 | 6 | 0 | 10.180591  | 4.238417  | -0.243934 |
| 133 | 8 | 0 | 11.447720  | 2.472869  | -1.316599 |
| 134 | 6 | 0 | 8.827244   | 4.382027  | 0.081855  |
| 135 | 8 | 0 | 6.852752   | 3.029036  | -0.174254 |
| 136 | 6 | 0 | 11.103352  | 5.238678  | 0.045754  |
| 137 | 6 | 0 | 8.355796   | 5.531508  | 0.708866  |
| 138 | 6 | 0 | 10.635453  | 6.395532  | 0.675139  |
| 139 | 1 | 0 | 12.150314  | 5.112655  | -0.213619 |
| 140 | 6 | 0 | 9.277646   | 6.539916  | 1.002947  |
| 141 | 1 | 0 | 7.303252   | 5.628776  | 0.957755  |
| 142 | 1 | 0 | 11.329147  | 7.196449  | 0.916437  |
| 143 | 1 | 0 | 8.942845   | 7.450095  | 1.493321  |
| 144 | 6 | 0 | -4.366249  | 7.356994  | -2.495442 |
| 145 | 1 | 0 | -4.947262  | 8.212010  | -2.832505 |
| 146 | 6 | 0 | 8.207335   | -1.111446 | -2.467770 |
| 147 | 1 | 0 | 9.230631   | -1.282718 | -2.792988 |

---
